# Supplementary material for: Changing the definition of treatment success alters treatment outcomes in periprosthetic joint infection: a systematic review and meta-analysis
Source: Copernicus journal article supplement (doi:10.5194/jbji-9-127-2024), 2024-04-26
Supplement: Supplementary file [file jbji-9-127-2024-supplement.pdf]

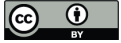

*Supplement of*

## **Changing the definition of treatment success alters treatment outcomes in periprosthetic joint infection: a systematic review and meta-analysis**

**Eytan M. Debbi et al.**

*Correspondence to:* Alberto V. Carli (carlia@hss.edu)

The copyright of individual parts of the supplement might differ from the article licence.

**Table S1:** Search terms for each database regarding the 1-stage revisions

| <b>Database</b>       | <b>Search Terms</b>                                                                                                                                                                                                                                                                                                                                                                                                                                                         |
|-----------------------|-----------------------------------------------------------------------------------------------------------------------------------------------------------------------------------------------------------------------------------------------------------------------------------------------------------------------------------------------------------------------------------------------------------------------------------------------------------------------------|
| <i>Pubmed/MedLine</i> | periprosthetic joint infection[tw]<br>OR peri-prosthetic joint infection[tw]<br>OR PJI[tw]<br>OR Prosthesis-Related Infections[mesh]<br>AND<br>one-stage revision[tw]<br>OR 1-stage revision[tw]<br>OR single-stage revision[tw]<br>OR one-stage exchange[tw]<br>OR 1-stage exchange[tw]<br>OR single-stage exchange[tw]                                                                                                                                                    |
| <i>Cochrane</i>       | "periprosthetic joint infection":ti,ab,kw<br>OR "peri-prosthetic joint infection":ti,ab,kw<br>OR PJI:ti,ab,kw<br>OR [mh "Prosthesis-Related Infections"]<br>AND<br>"one-stage revision":ti,ab,kw<br>OR "1-stage revision":ti,ab,kw<br>OR "single-stage revision":ti,ab,kw<br>OR "one-stage exchange":ti,ab,kw<br>OR "1-stage exchange":ti,ab,kw<br>OR "single-stage exchange":ti,ab,kw                                                                                      |
| <i>Embase</i>         | "periprosthetic joint infection":ti,ab,de,tn,kw<br>OR "peri-prosthetic joint infection":ti,ab,de,tn,kw<br>OR PJI:ti,ab,de,tn,kw<br>OR 'periprosthetic joint infection'/exp<br>AND<br>'one-stage revision'/exp<br>OR "one-stage revision":ti,ab,de,tn,kw<br>OR "1-stage revision":ti,ab,de,tn,kw<br>OR "single-stage revision":ti,ab,de,tn,kw<br>OR "one-stage exchange":ti,ab,de,tn,kw<br>OR "1-stage exchange":ti,ab,de,tn,kw<br>OR "single-stage exchange":ti,ab,de,tn,kw |

**Table S2:** Search terms for each database regarding the 2-stage revisions

| <b>Database</b>       | <b>Search Terms</b>                                                                                                                                                                                                                                                                                                                                                               |
|-----------------------|-----------------------------------------------------------------------------------------------------------------------------------------------------------------------------------------------------------------------------------------------------------------------------------------------------------------------------------------------------------------------------------|
| <i>Pubmed/MedLine</i> | periprosthetic joint infection[tw]<br>OR peri-prosthetic joint infection[tw]<br>OR PJI[tw]<br>OR Prosthesis-Related Infections[mesh]<br>AND<br>two-stage revision[tw]<br>OR 2-stage revision[tw]<br>OR two-stage exchange[tw]<br>OR 2-stage exchange[tw]                                                                                                                          |
| <i>Cochrane</i>       | "periprosthetic joint infection":ti,ab,kw<br>OR "peri-prosthetic joint infection":ti,ab,kw<br>OR PJI:ti,ab,kw<br>OR [mh "Prosthesis-Related Infections"]<br>AND<br>"two-stage revision":ti,ab,kw<br>OR "2-stage revision":ti,ab,kw<br>OR "two-stage exchange":ti,ab,kw<br>OR "2-stage exchange":ti,ab,kw                                                                          |
| <i>Embase</i>         | "periprosthetic joint infection":ti,ab,de,tn,kw<br>OR "peri-prosthetic joint infection":ti,ab,de,tn,kw<br>OR PJI:ti,ab,de,tn,kw<br>OR 'periprosthetic joint infection'/exp<br>AND<br>'two-stage revision'/exp<br>OR "two-stage revision":ti,ab,de,tn,kw<br>OR "2-stage revision":ti,ab,de,tn,kw<br>OR "two-stage exchange":ti,ab,de,tn,kw<br>OR "2-stage exchange":ti,ab,de,tn,kw |
